# Supplementary material
Source: PubMed Central journal article supplement (PMC4451456)
Supplement: NIHMS643917-supplement-8.pdf [file NIHMS643917-supplement-8.pdf]

1 **Revised version (changes highlighted in blue)**

2

3

## Supplemental Information

4

5 - Supplemental Figures S1-6

6 - Supplemental Figure Legends

7 - Supplemental Experimental Procedures

8 - Supplemental References

9 - Supplemental Table S1, related to Figure 1

10 - Supplemental Table S2, related to Figures 1 and 2

11 - Supplemental Table S3, related to Figure 1

12 - Supplemental Table S4, related to Figure 1

13 - Supplemental Table S5, related to Figures 2, 3, 4 and 5

14 - Supplemental Table S6, related to Figure 6

15

16

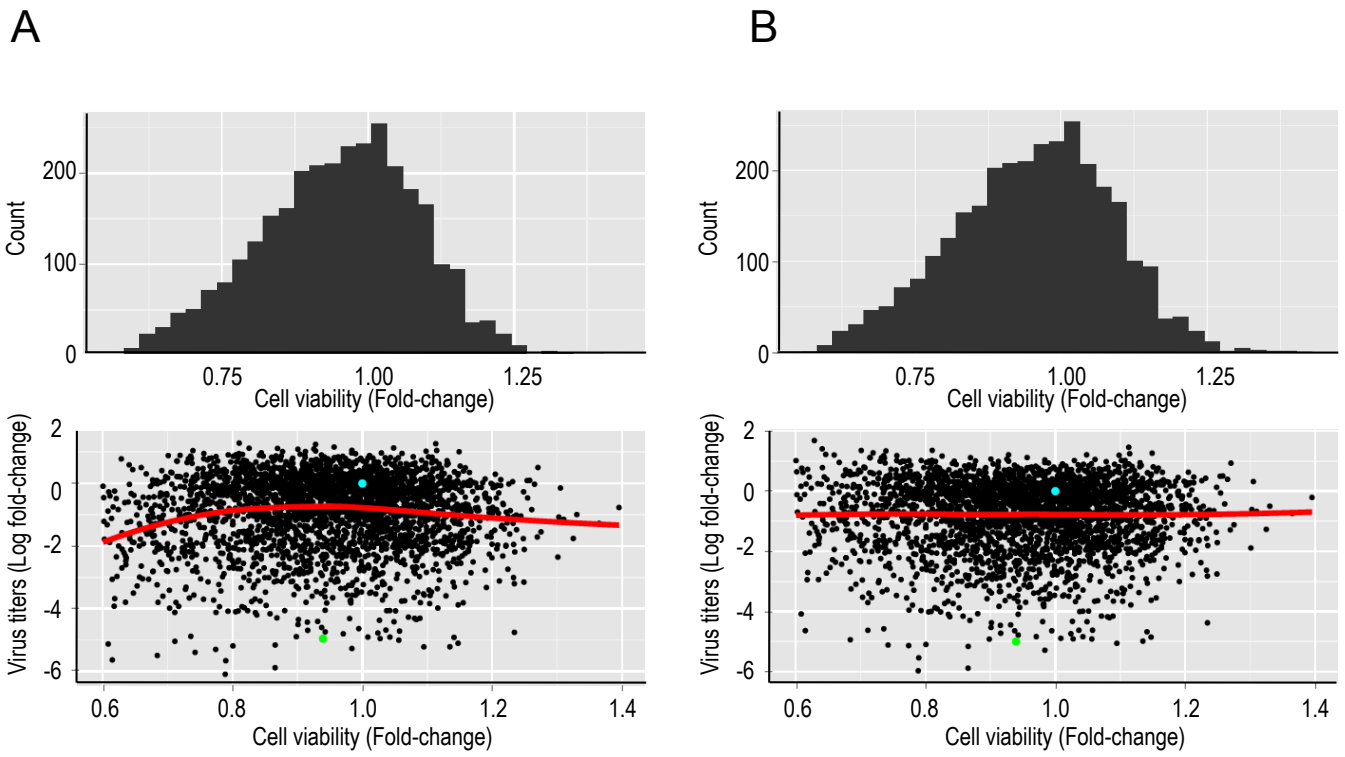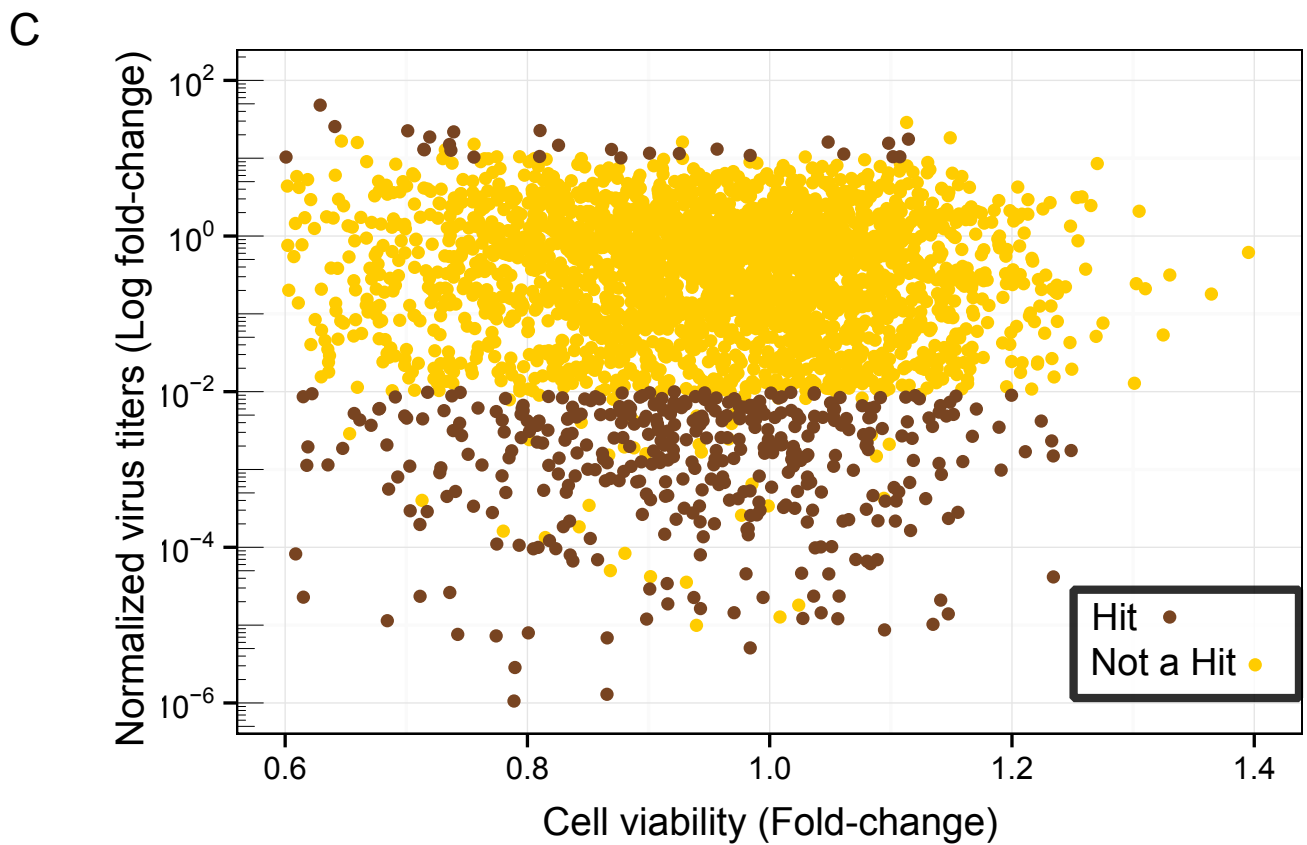

Fig. S1. Watanabe et al.

A

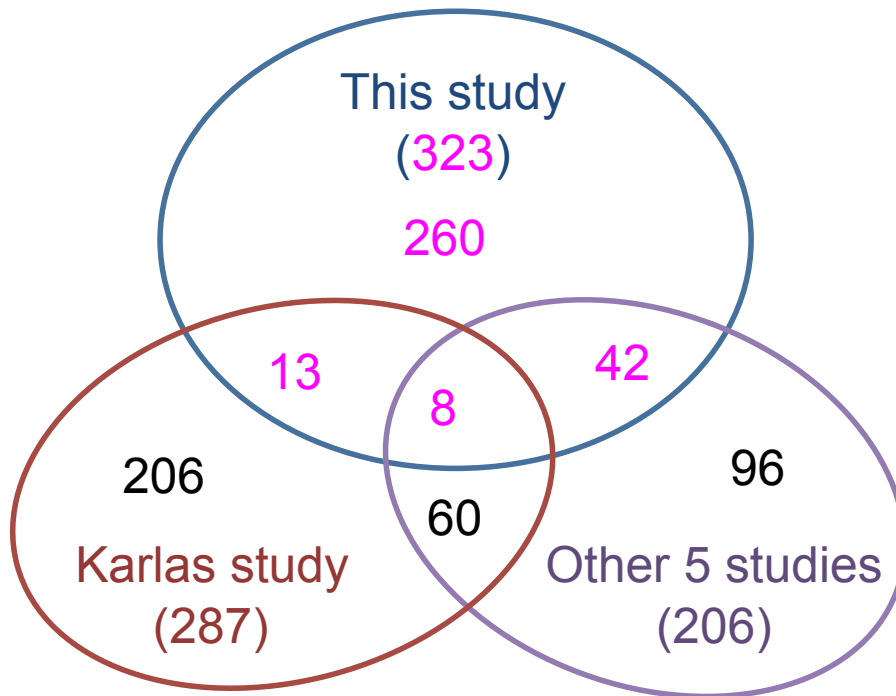

B

No. of host factors identified in this study that overlapped with other screens:  
 (note that some of the factors detected in our study were found in more than one of the other studies)

| Karlas <i>et al.</i> | Konig <i>et al.</i> | Brass <i>et al.</i> | Shapira <i>et al.</i> | Hao <i>et al.</i> | Sui <i>et al.</i> | Total |
|----------------------|---------------------|---------------------|-----------------------|-------------------|-------------------|-------|
| 21                   | 12                  | 15                  | 16                    | 15                | 3                 | 63    |

Fig. S2. Watanabe et al.

A

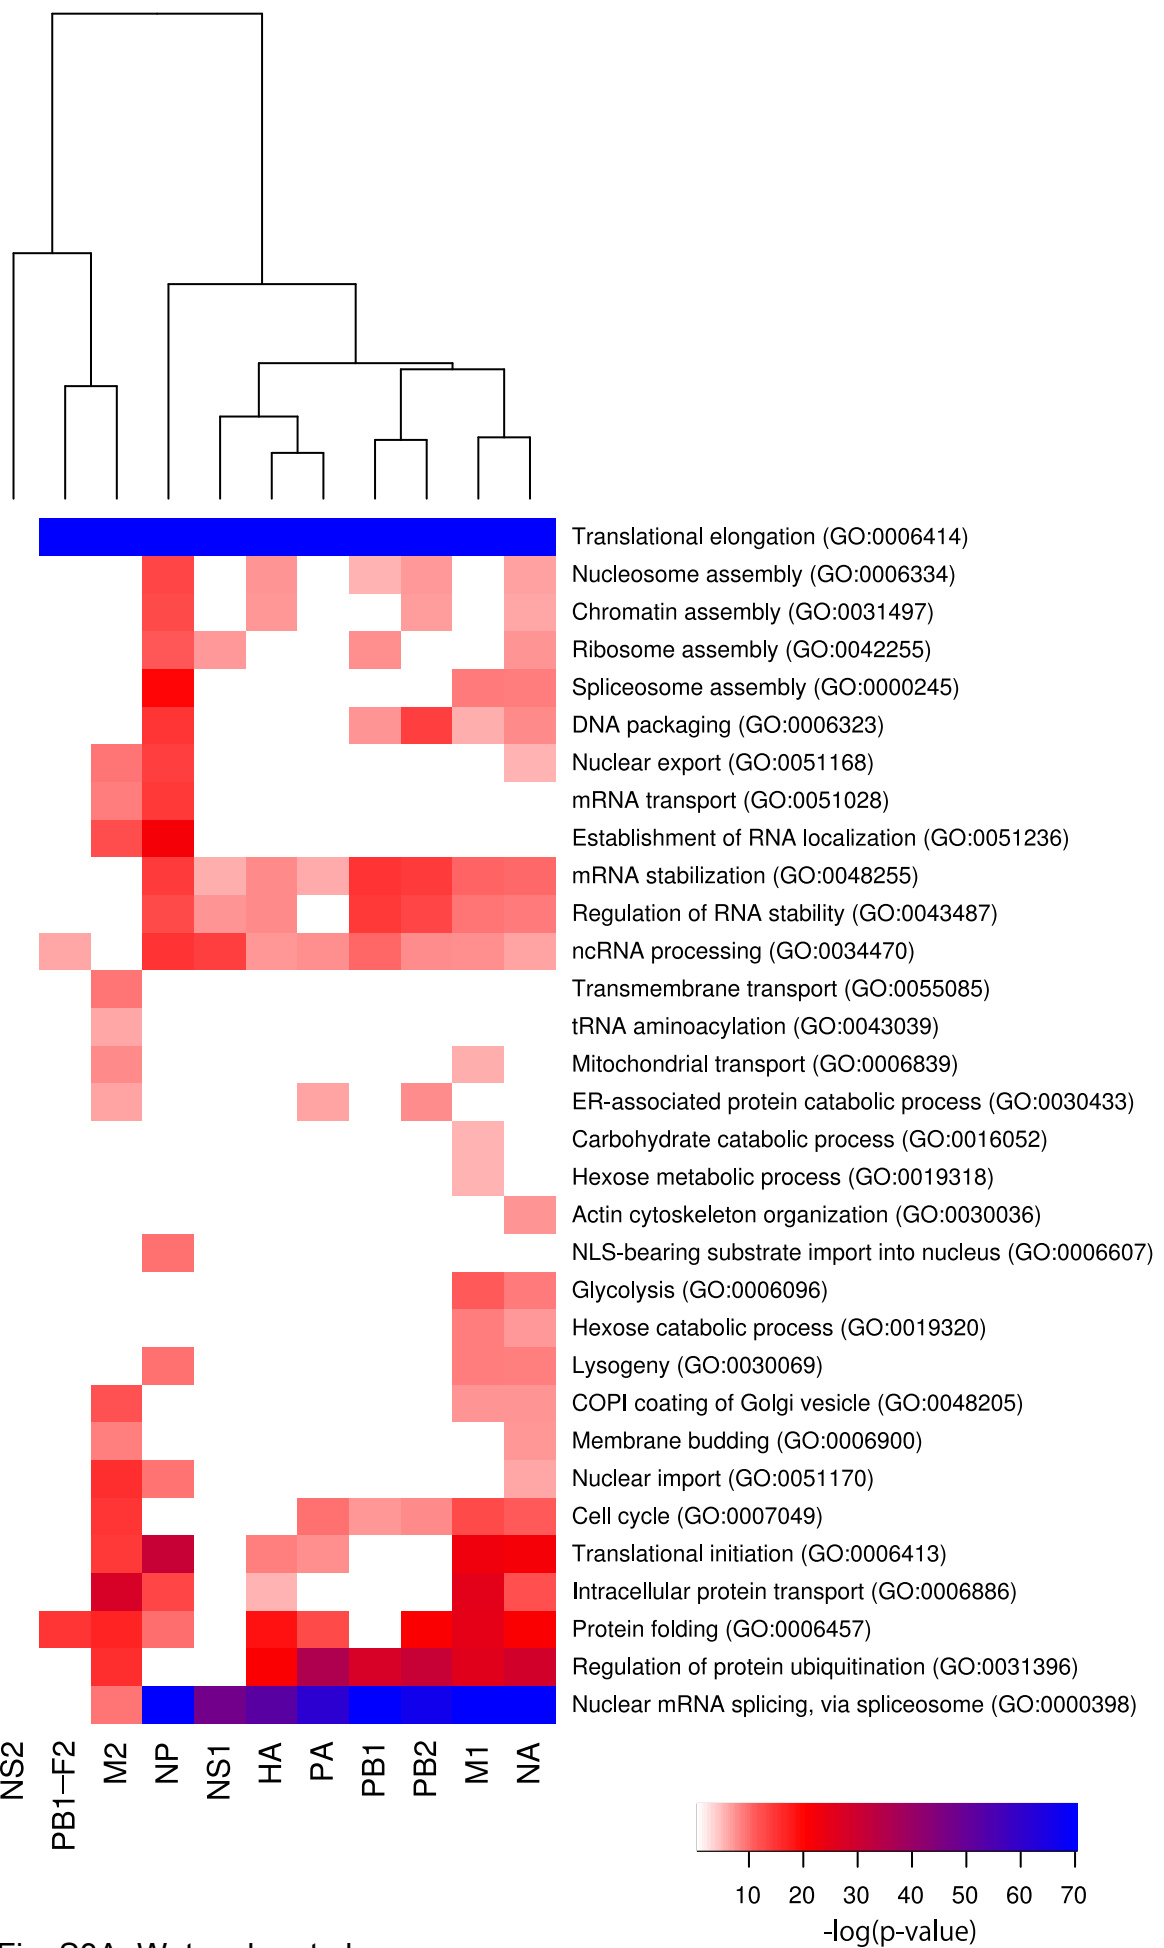

Fig. S3A. Watanabe et al.

B

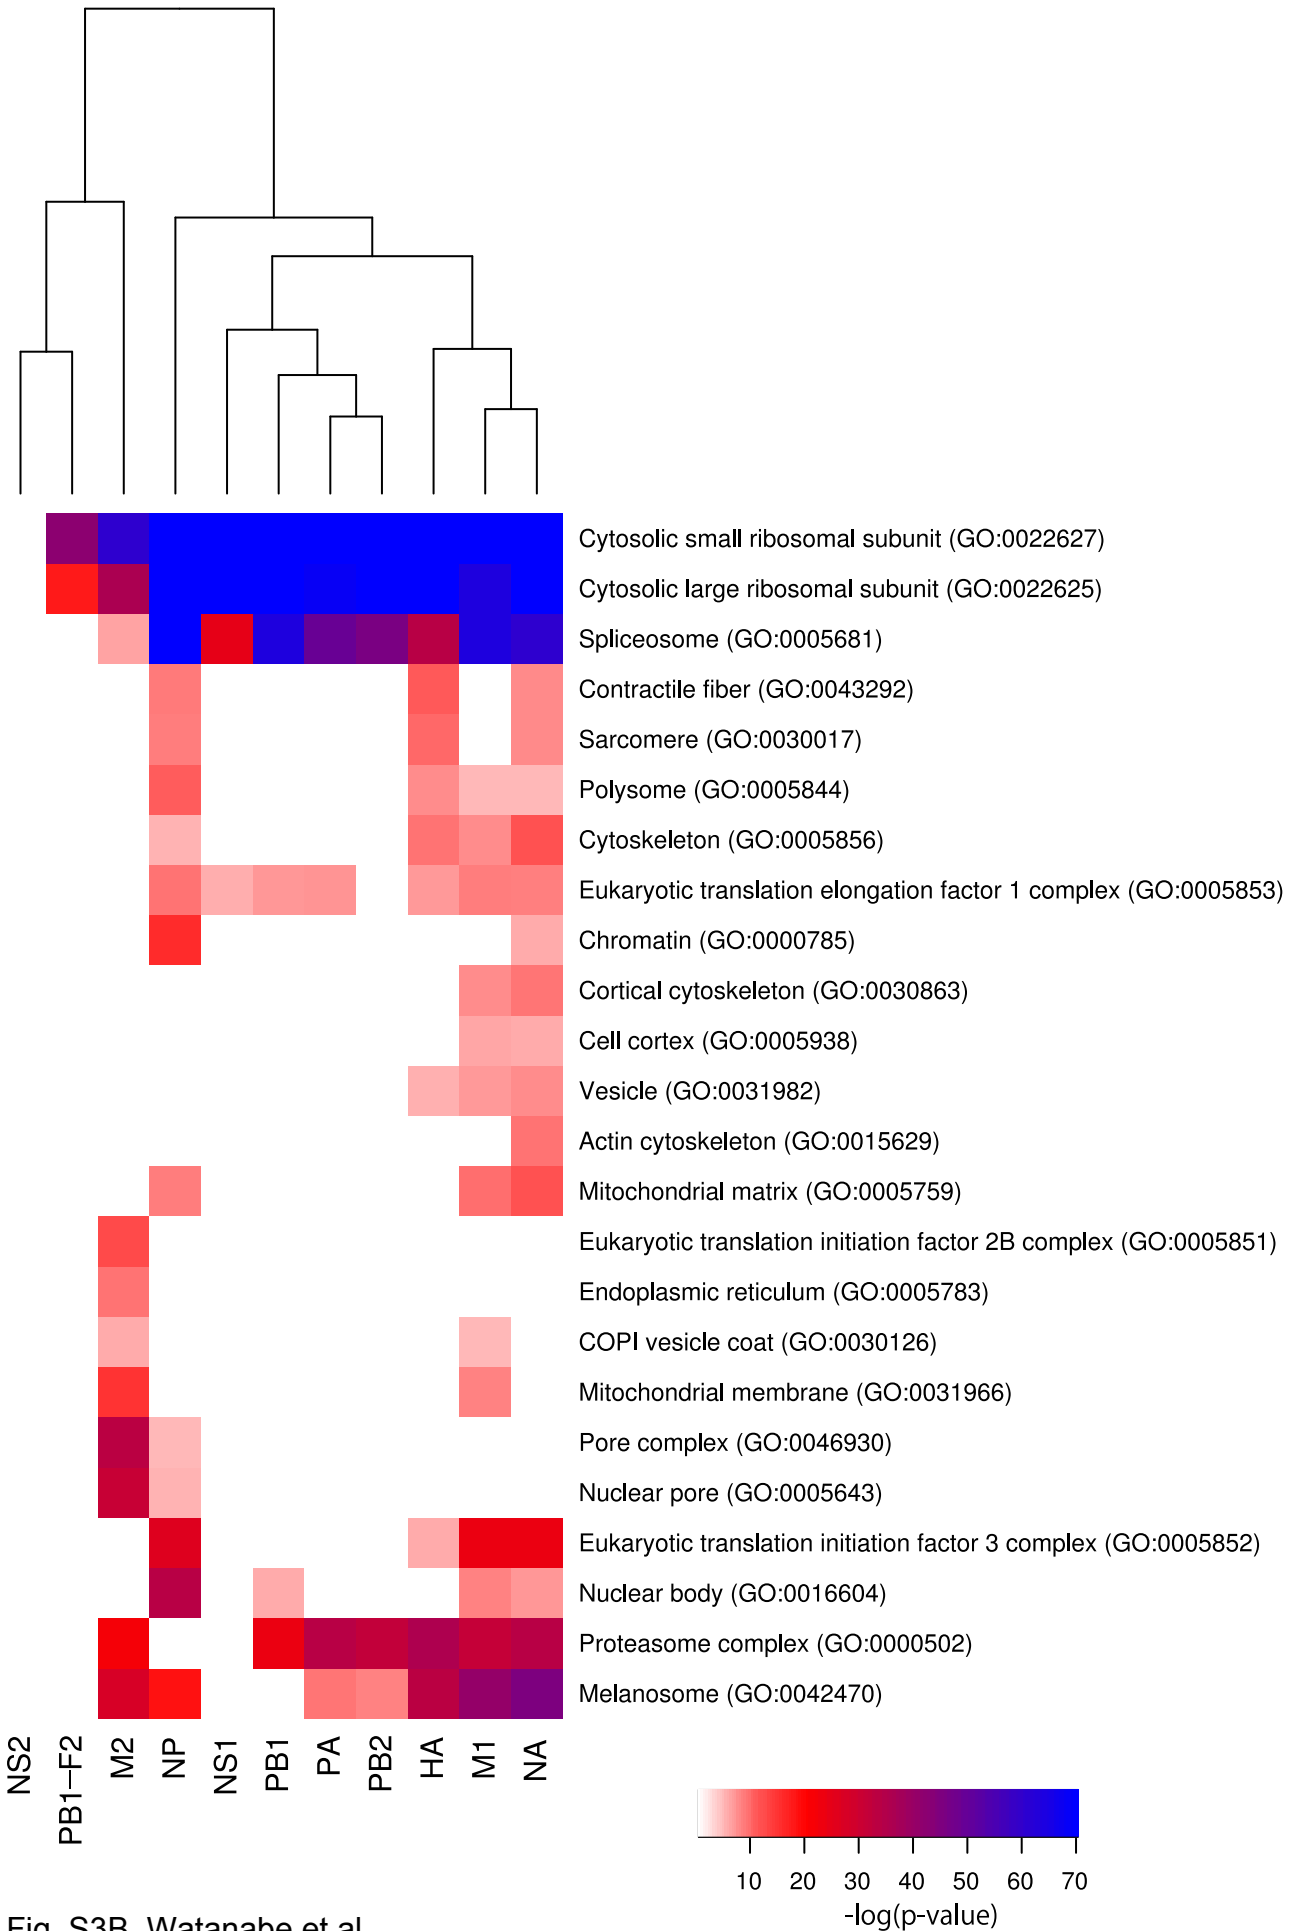

Fig. S3B. Watanabe et al.

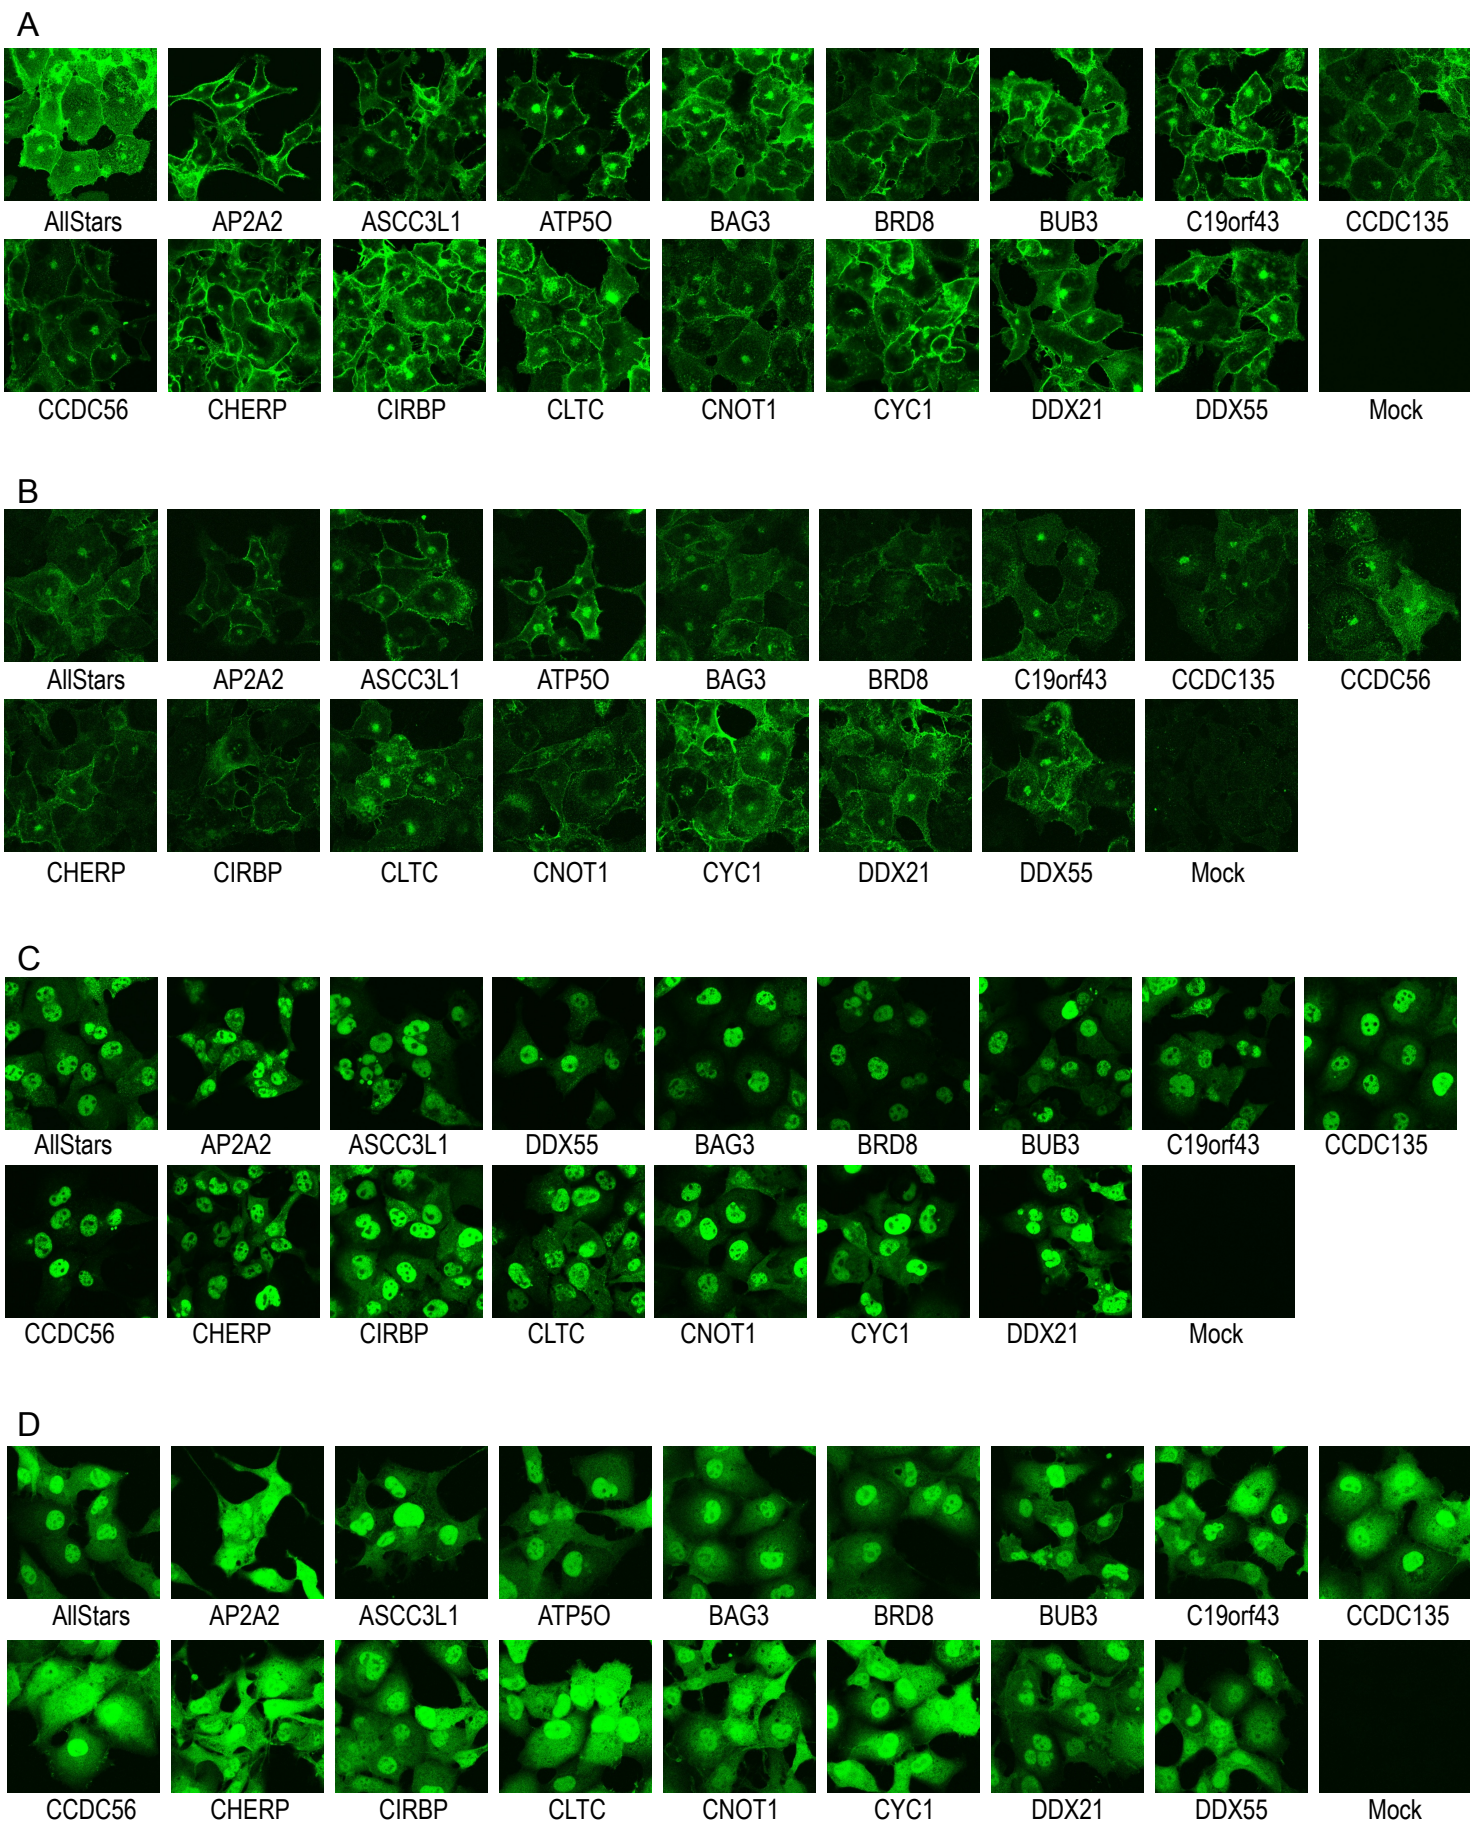

Fig S4. Watanabe et al.



## A. Viral genome replication/transcription

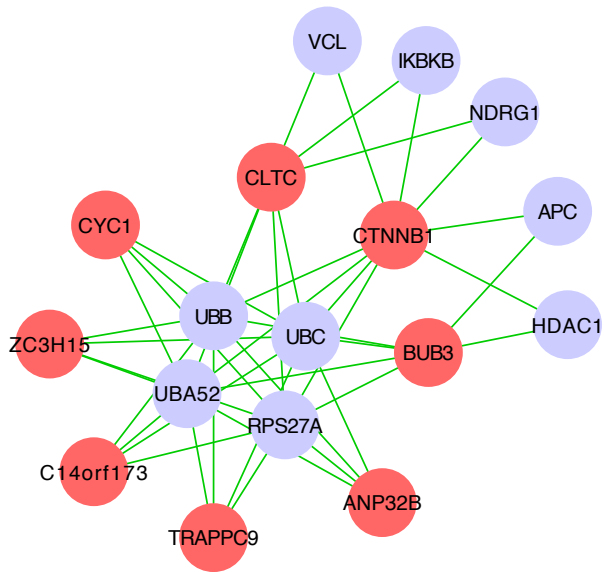

## B. Early steps of viral life cycle

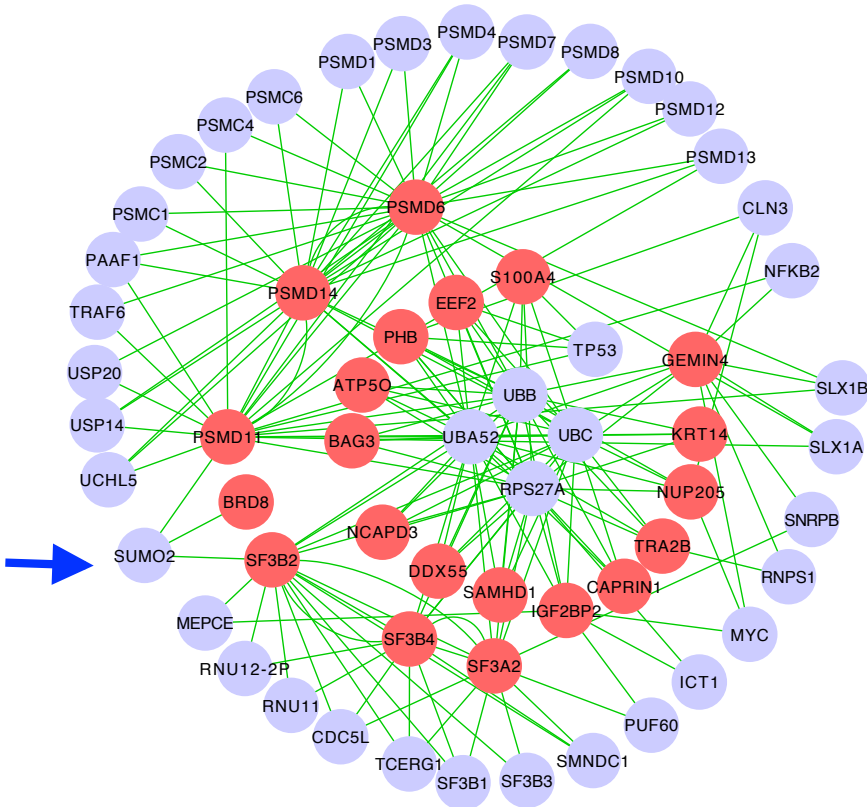

## C. HA VLP formation

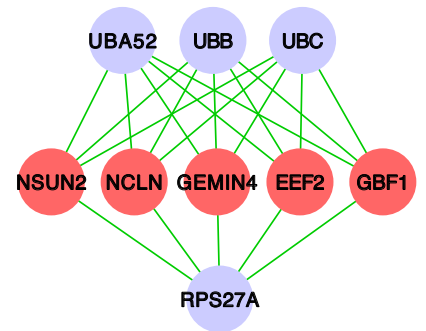

## D. M1 VLP formation

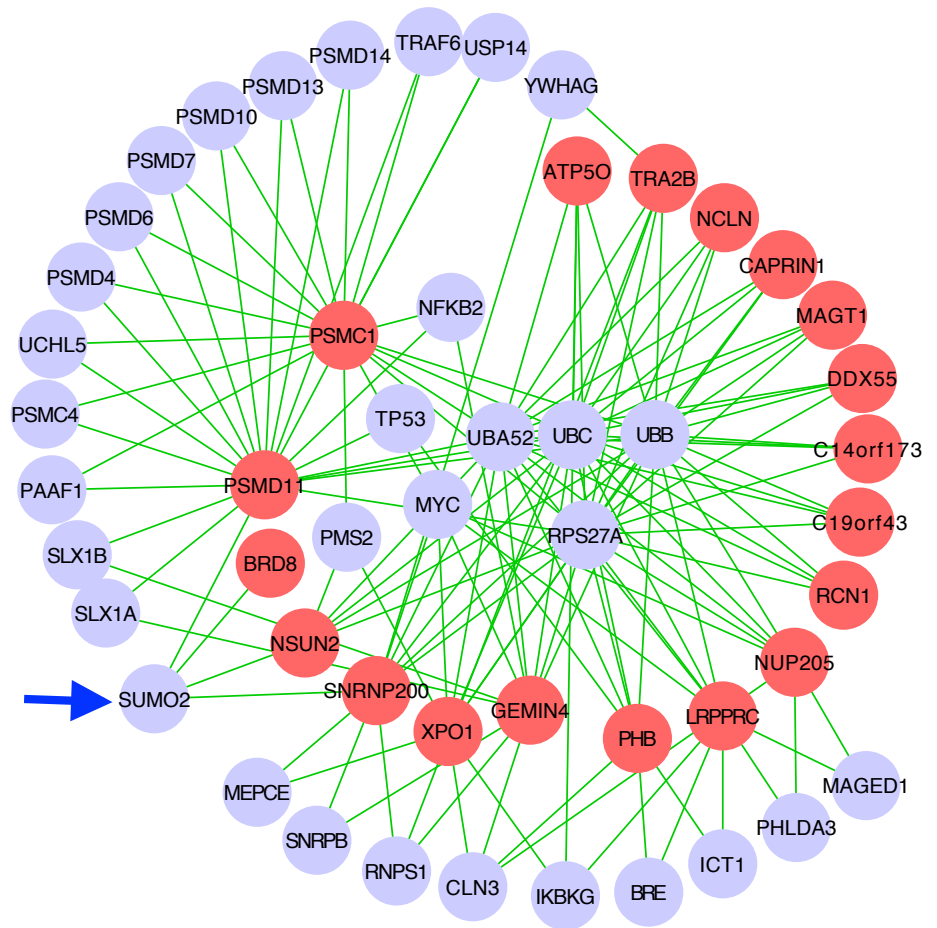

## E. vRNP incorporation into virions

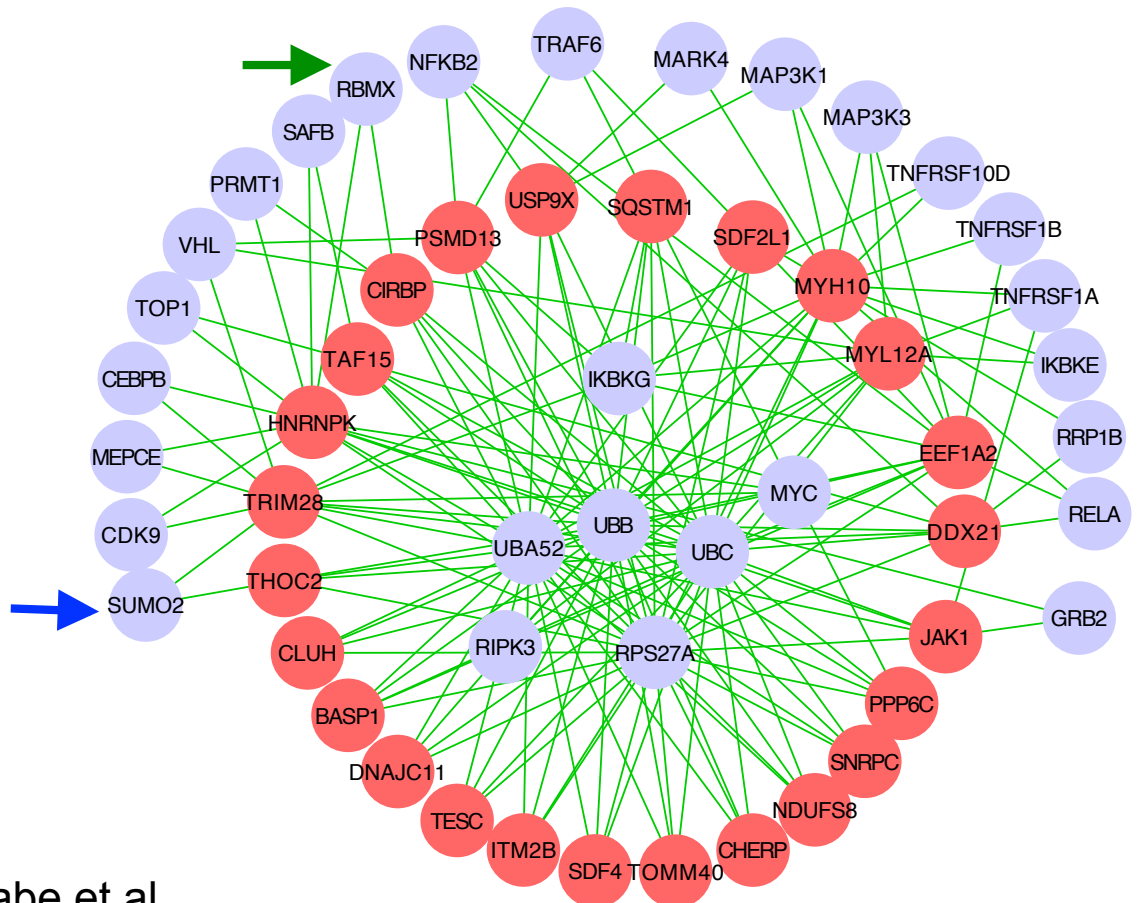

Fig. S5. Watanabe et al.



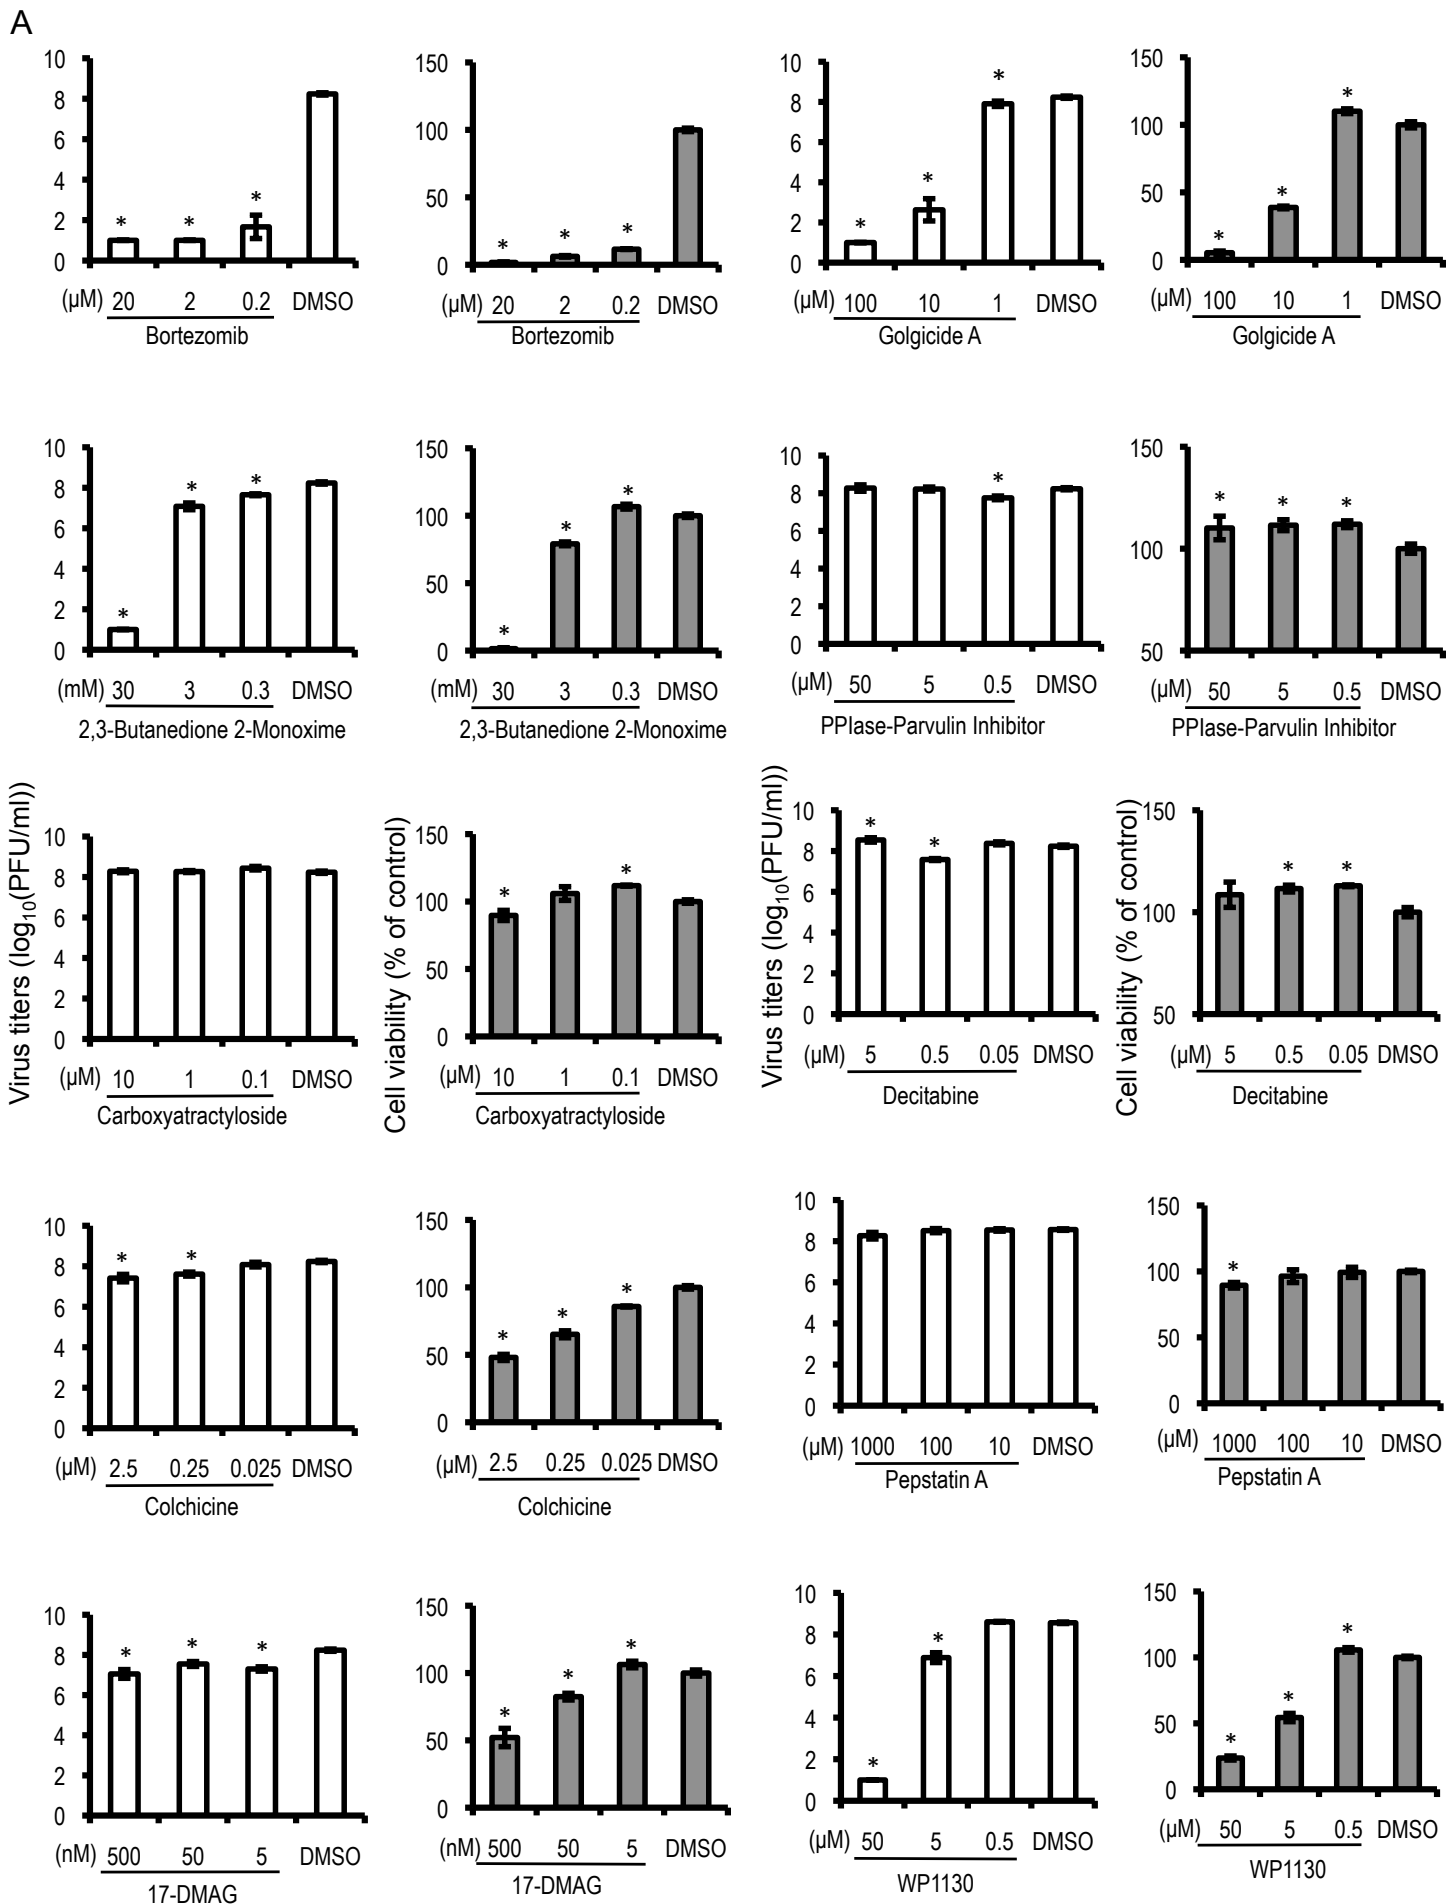

Fig. S6. Watanabe et al.

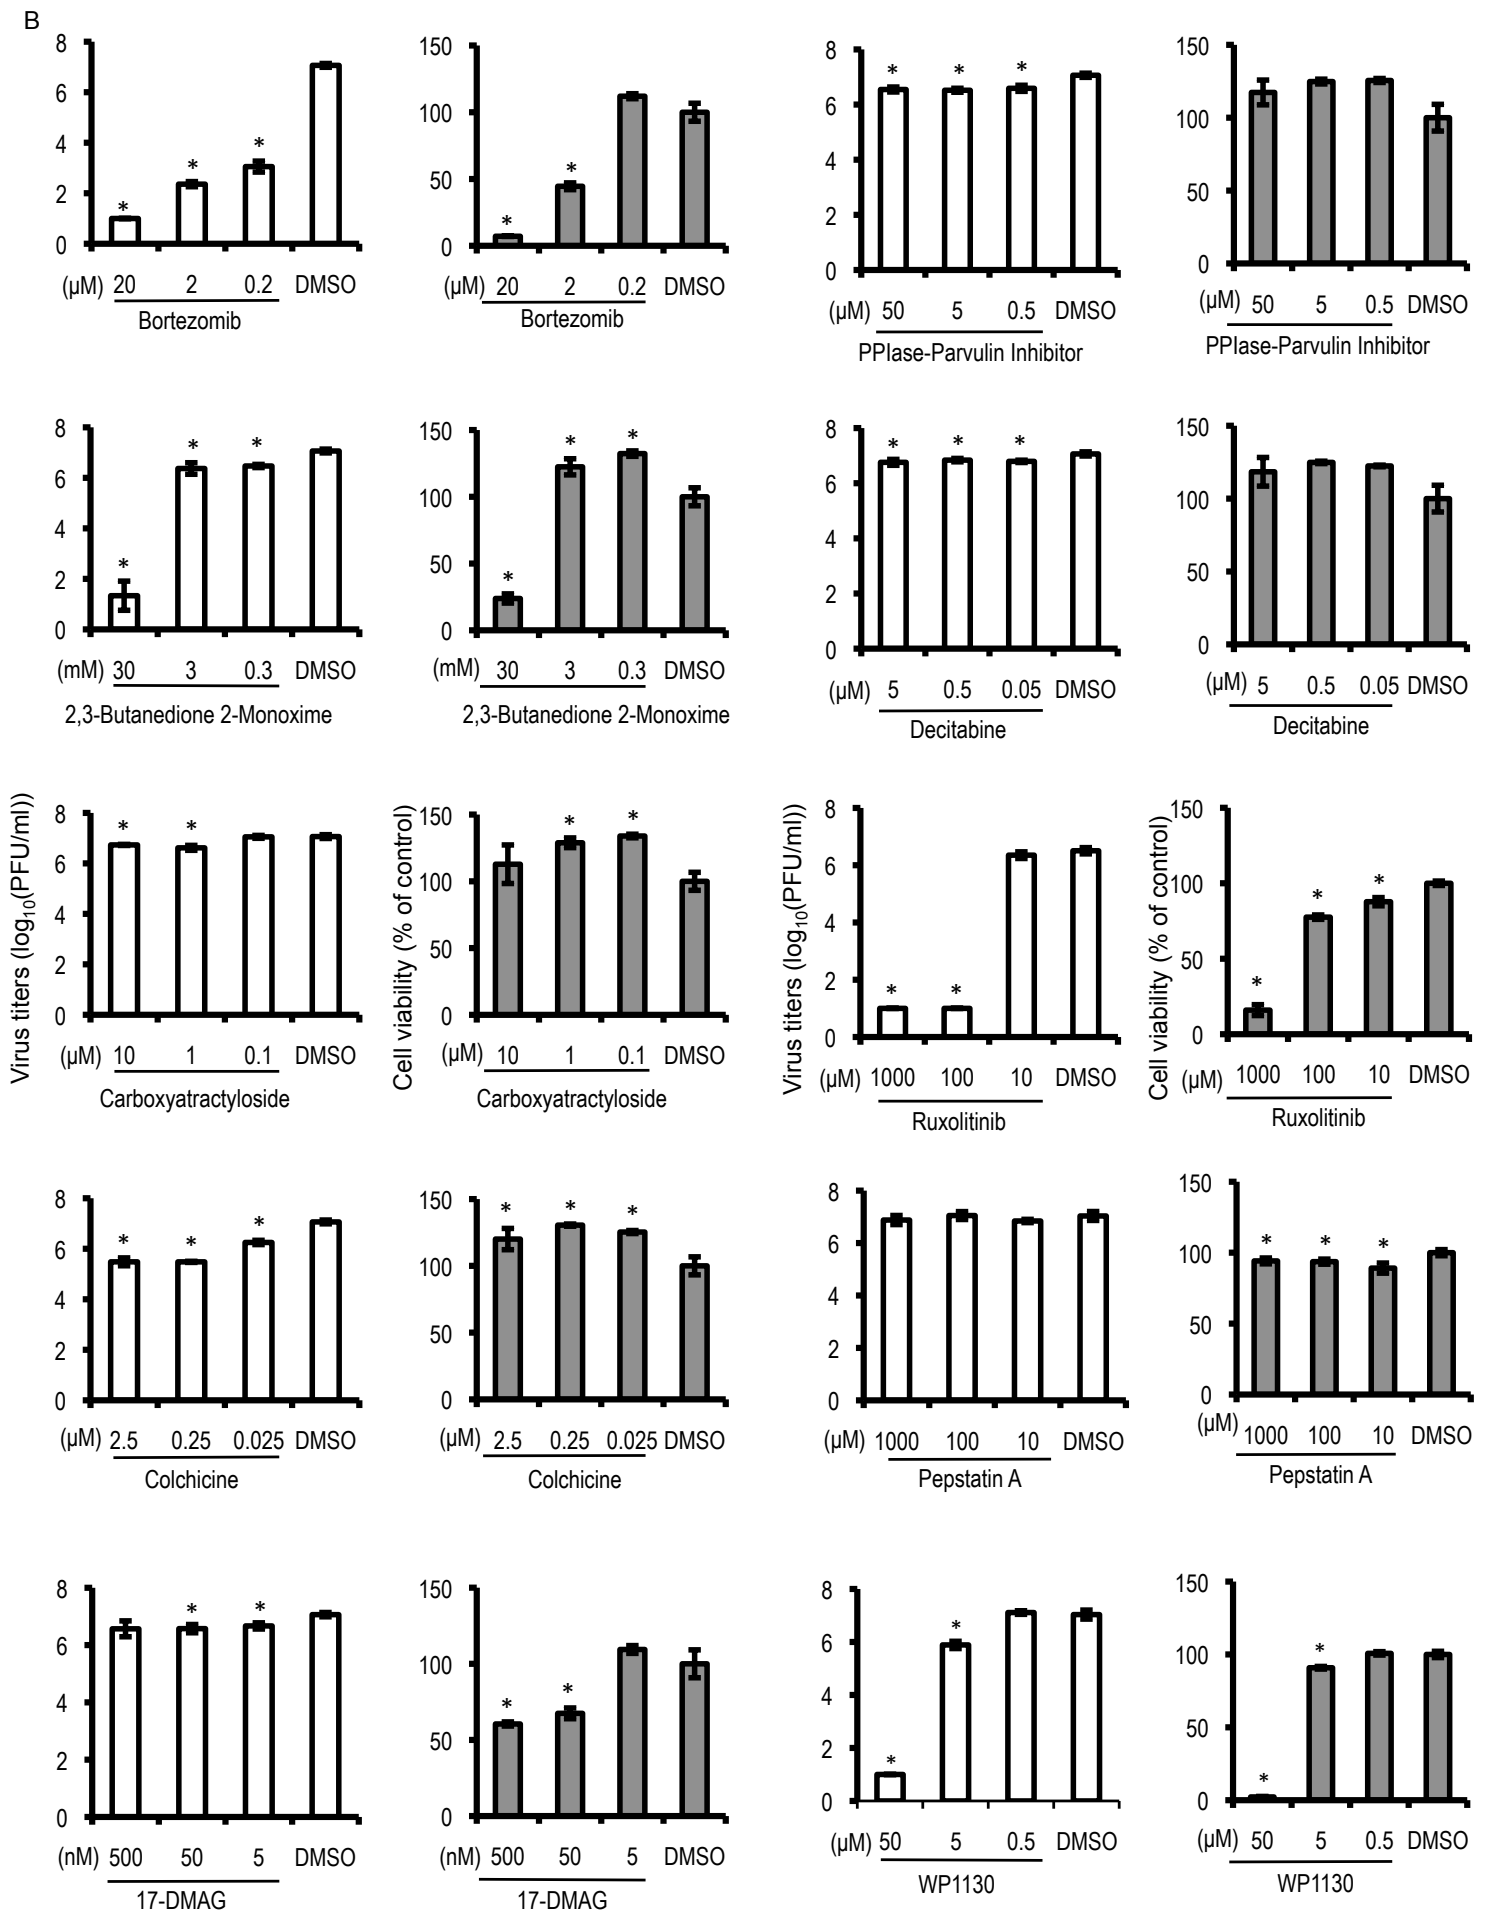

Fig. S6. Watanabe et al.

## 16 Supplemental Figure Legends

17 **Figure S1, related to Figure 1. Identification of host genes whose siRNA-**  
18 **mediated down-regulation affected virus production.** After removing all siRNAs  
19 that caused a fold-change (FC) in cell viability (relative to All Stars Negative Control)  
20 of 0.6 or greater, we applied LOESS normalization to remove additional cell viability-  
21 dependent effects in the virus growth data. (A) The distribution of the FC in cell  
22 viability for all siRNAs tested (top panel) and the dependence of the average virus  
23 titers on average cell viability in the raw data (lower panel). (B) Normalized data are  
24 shown. In (A) and (B), the cyan and green points highlight data corresponding to the  
25 negative and positive control siRNAs (i.e., AllStars Negative Control siRNA and  
26 siRNA against influenza virus NP gene, respectively), whereas the LOESS curve (red  
27 line) illustrates how the mean log-fold change (LFC) in virus titers fluctuated with  
28 cell viability before and after data normalization, respectively. (C) Scatter plot of the  
29 fold-change (FC) in normalized virus titers versus the FC in cell viability. ‘Hit’  
30 (brown dot) indicates siRNAs that affected virus growth significantly ( $p < 0.01$ ) (i.e.,  
31 they reduced the normalized virus titers by more than 2-log units or increased them by  
32 more than 1-log unit compared with the negative control siRNA) without reducing  
33 cell viability by more than 40%. ‘Not a Hit’ (yellow dot) indicates that the respective  
34 siRNA had no significant effect on virus titers ( $p > 0.01$ ), or that down-regulation of  
35 host gene expression by the respective siRNA could not be confirmed by qRT-PCR.

36

37 **Figure S2, related to Figure 1. Comparison of the 323 genes identified in our**  
38 **study with the host genes identified in the six independent genome-wide screens**  
39 **for human genes involved in influenza virus replication. To determine whether any**

40 of the genes identified in this study were also identified in previously reported  
41 genome-wide screens (Brass et al., 2009; Hao et al., 2008; Karlas et al., 2010; Konig  
42 et al., 2010; Shapira et al., 2009; Sui et al., 2009), we conducted pair-wise  
43 comparisons of our hits with those identified in previous genome-wide screens for  
44 human genes (including 110 *Drosophila* genes that have human orthologs) involved  
45 in influenza virus replication (Brass et al., 2009; Hao et al., 2008; Karlas et al., 2010;  
46 Konig et al., 2010; Shapira et al., 2009; Sui et al., 2009). (A) Venn diagram of the  
47 host factors identified as being involved in influenza virus replication in our study and  
48 in other studies. Shown are the total numbers of host genes whose suppression  
49 affected influenza virus replication (in parenthesis), and the numbers of host genes  
50 that were unique to the respective dataset or overlapped with the indicated dataset(s),  
51 respectively. (B) Numbers of host factors identified in this studies that overlapped  
52 with other studies. The dataset reported by Karlas *et al.* (Karlas et al., 2010) contains  
53 the highest number (21 genes) of host genes that were also identified by us,  
54 presumably because Karlas *et al.* used the same approach as we did (an RNAi-based  
55 screen in human cells) and the same influenza virus strain (i.e., WSN). By contrast,  
56 the screen by Sui *et al.* (Sui et al., 2009) identified the lowest number of host genes (3  
57 genes) that were also identified by us, possibly due to differences in the screening  
58 systems used (RNAi screen vs. Random Homozygous Gene Perturbation library  
59 screen). See also Table S3.

60

61 **Figure S3, related to Figure 1. Gene Ontology (GO) and pathway analyses of the**  
62 **323 human genes identified to be involved in the influenza virus life cycle.**  
63 Biological processes (A) and cellular components (B) in which the 323 human genes  
64 identified in this study are involved, based on DAVID (Huang et al., 2008) and

65 ConsensusPathBD (Kamburov et al., 2011). While most viral proteins interacted with  
66 a sufficient number of host proteins to perform an enrichment analysis and obtain  
67 significant results, the NS2 protein had too few binding proteins to perform this  
68 analysis. (A) The identified host factors are involved in various cellular functions,  
69 ranging from protein and RNA transport to cell cycle regulation as described in the  
70 main text. (B) Many of the identified host factors are involved in the formation of  
71 ribosomal complexes, eukaryotic translation elongation/initiation complexes, and  
72 proteasome complexes.

73

74 **Figure S4, related to Figure 4. Effects of siRNAs targeting the 91 ‘top hits’ on the**  
75 **intracellular localization of viral proteins in infected cells.** To examine whether the  
76 down-regulation of the 91 ‘top hits’ affects the intracellular localization of the viral  
77 proteins in virus-infected cells, siRNA-transfected HEK 293 cells were infected with  
78 200 pfu of WSN virus per well of a 24-well tissue culture plate, fixed at 12 h post-  
79 infection, and then stained with anti-HA, anti-NA, anti-NP, or anti-M1 antibody.  
80 Intracellular localization of HA (A), NA (B), NP (C), and M1 (D) are shown in Figure  
81 4 and Figure S4. Because all of the pictures were taken under the same conditions,  
82 some were overexposed, and therefore, it was difficult to determine whether some of  
83 the host factors are involved in the localization of viral proteins. However, siRNAs  
84 targeting *SFRS10*, *GBF1*, *KRT14*, *CAPRINI*, and *PPP6C* clearly altered the  
85 localization of HA (Figure 4A), whereas those targeting *PPP6C*, *BUB3*, *GBF1*,  
86 *KRT14*, and *SDF2L1* affected NA localization (Figure 4B). Our results suggest that  
87 these host proteins may be involved in the transport of HA, NA, or both to the plasma  
88 membrane. In the presence of siRNAs against *PHB*, *ITGB4BP*, *PSMD11*, *VCP*, *XPO1*  
89 or *ATP5O*, NP accumulated in the nucleus, whereas it localized to the nucleus and

90 cytoplasm in control cells (Figure 4C). The host factors that affected NP localization  
91 also reduced cellular transcription/translation, with the exception of *XPO1* (also  
92 known as *CRM1*), which mediates influenza vRNP nuclear export through an  
93 interaction with the viral nuclear export protein (NS2=NEP) (Boulo et al., 2007; Elton  
94 et al., 2001; Neumann et al., 2000). By contrast, none of the siRNAs shown in Figure  
95 S4 had an appreciable effect on the localization of the viral proteins (representative  
96 images are shown). The same images for AllStars controls are also used in Figures  
97 4A–C as a reference.

98

99 **Figure S5, related to Figures 2 and 3. Interaction networks of host proteins that**

100 **affect different steps of the influenza virus life cycle.** (A–E) Depicted are host

101 factors that are potentially involved in the indicated step(s) of the influenza viral life

102 cycle (red circle) and share cellular binding partners (purple circle) with at least one

103 other ‘red’ host factors (note that these criteria led to the exclusion of some of the

104 factors described in the text). The interaction networks are visualized by using

105 Cytoscape (<http://cytoscape.org/>). (A) Viral genome replication/transcription.

106 CCDC56 (Table S5A) was excluded based on the criteria described above. TRAPPC9

107 is an alternate name for NIBP. (B) Early steps of the viral life cycle. DPM3 and

108 CCDC135 (Table S5A) were excluded based on the criteria described above. TRA2B

109 is an alternate name for SFRS10. (C, D) HA and M1 VLP formation. DPM3 (Table

110 S5A) was excluded based on the criteria described above. SNRNP200, MAGT1, and

111 NSUN2 are alternate names for ASCC3L1, DKFZp564K142, and FLJ20303,

112 respectively. (E) vRNP incorporation into virions. RPL26, SFRS28, and PCDHB12

113 (Table S5A) were excluded based on the criteria described above. CLUH and

114 MYL12A are alternate names for KIAA0664 and MRCL3, respectively. Blue and



115 green arrows indicate SUMO2 and RBMX, respectively, which are discussed in the  
116 text.

117

118 **Figure S6, related to Figure 6. Effects of selected drugs on virus titers and cell**  
119 **viability in virus-infected cells.** HEK 293 or A549 cells were infected with WSN  
120 virus at an MOI of 0.001. After incubation for one hour, cells were washed and  
121 incubated with medium containing the indicated concentration of drugs. DMSO (final  
122 concentration, 1%) was used as a control. Forty-eight hours later, culture  
123 supernatants were harvested for virus titration and cell viability was determined by  
124 using CellTiter-Glo. (A and B) Drugs targeting host factors identified in our siRNA-  
125 based screen were tested in HEK 293 (A) or A549 (B) cells. Averages and standard  
126 deviations of 3 replicates are shown. The  $p$  value was calculated with Welch's t-test  
127 compared with a non-targeting siRNA control. To control for the multiplicity effect,  $p$   
128 values were adjusted using Benjamini-Hochberg's procedure keeping the false  
129 discovery ratio  $< 0.05$ . Asterisk indicates that the adjusted  $p$  value is  $< 0.05$ .

130

130

## 131 **Supplemental Experimental Procedures**

132 **Pull-down assay and mass spectrometry.** HEK 293 cells were transfected with a  
133 plasmid encoding an N- or C-terminally FLAG-tagged influenza viral protein by  
134 using TransIT 293 reagent (Mirus Bio Corp., Madison, WI, USA). After 24 h, the  
135 cells were lysed with lysis buffer [50 mM Tris-HCl (pH 7.5), 150 mM NaCl, 1 mM  
136 EDTA, 0.5% Nonidet P-40, and protease inhibitor mixture Complete Mini (Roche,  
137 Mannheim, Germany)] for 1 h at 4 °C. After centrifugation, the supernatants were  
138 incubated with an anti-FLAG M2 Affinity Gel (Sigma-Aldrich) for 18 h at 4 °C. The  
139 affinity gel was then washed three times with lysis buffer and twice with  
140 immunoprecipitation (IP) buffer [50 mM Tris-HCl (pH 7.5), 150 mM NaCl, and 1  
141 mM EDTA]. Proteins were eluted for 2 h with IP buffer containing 0.5 mg/mL FLAG  
142 peptide (Sigma-Aldrich) at 4 °C with agitation. The affinity gel was removed by  
143 centrifugation, and the supernatants were then filtered through an Ultrafree-MC filter  
144 (Millipore). The eluted proteins were then subjected to nanoflow liquid  
145 chromatography tandem mass spectrometry (nanoLC-MS/MS) analysis. Q-STAR  
146 Elite (AB SCIEX) coupled with Dina (KYA Technologies) was used to analyze the  
147 mass spectrometry data. Co-immunoprecipitated host proteins were identified by  
148 comparing MS/MS signals with the RefSeq (National Center for Biotechnology  
149 Information) human protein database (38,946 sequences as of April 7, 2009) and by  
150 using the Mascot algorithm (version 2.2.04; Matrix Science) with the following  
151 parameters: variable modifications, oxidation (Met), N-acetylation; maximum missed  
152 cleavages, 2; peptide mass tolerance, 200 ppm; and MS/MS tolerance, 0.5 Da. Protein  
153 identification required at least one MS/MS data signal with a Mascot score that  
154 exceeded the threshold ( $p < 0.05$ ).

155

156 **Protein-protein interaction analysis.**

157 We used HIPPIE database v1.4 (Schaefer et al., 2012) to analyze the interaction of  
158 host factors involved in one or more steps of influenza replication with other human  
159 proteins (Supplementary Table S5E–J). We started filtering the HIPPIE database by  
160 removing all interactions with a quality score  $\leq 0.7$ . Next, similar to a previous study  
161 (Tu et al., 2009), we pruned the original database by leaving only proteins that  
162 interacted with at least two host factors whose down-regulation affected influenza  
163 virus titers (Supplementary Figure S5) – this provided insights into the mechanisms  
164 involved in the different steps of the influenza replication cycle. In all network  
165 analyses, the HIPPIE database was converted to an undirected graph and processed  
166 using R (version 2.10.1) and the iGraph library (version 0.5.4).

167

168 **Gene Ontology and pathway analyses for the 323 host factors that co-**  
169 **immunoprecipitated with viral proteins and affected virus titers in cultured cells.**

170 For the set of 323 host factors that co-immunoprecipitated with viral proteins and  
171 affected influenza virus replication, major gene functions were determined. Our Gene  
172 Ontology (GO) and pathway analyses based on two web-resources, DAVID (Huang  
173 et al., 2008) and ConsensusPathBD (Kamburov et al., 2011), revealed that the  
174 identified host factors are involved in various cellular functions, ranging from protein  
175 and RNA transport to cell cycle regulation (Table S4). Most influenza viral proteins  
176 co-immunoprecipitated with host proteins involved in transcription, translation,  
177 mRNA splicing mechanisms, and proteasome complexes (Table S4). In addition,  
178 some viral proteins co-immunoprecipitated with host factors that are involved in  
179 specific cellular functions. For example, some of the M1- and NA-binding partners

180 are involved in glycolysis and COPI-coating of Golgi vesicles, and some of the NP-  
181 binding partners function in protein import and export to the nucleus (Table S4B).

182

183 **Immunofluorescence microscopy.** HEK 293 cells transfected with the respective  
184 siRNAs were infected with WSN virus. At 12 h after influenza virus infection, HEK  
185 293 cells were fixed with 4% paraformaldehyde in phosphate buffer (4% PFA/PB) for  
186 10 min, and then permeabilized by using 0.05% Triton-X100 in 4% PFA/PB for 10  
187 min. The cells were then blocked with Blocking One solution (Nacalai Tesque, Kyoto,  
188 Japan) for 30 min. To detect viral proteins, the cells were incubated overnight at 4 °C  
189 with anti-HA (WS3-54), anti-NA (WS5-29), anti-NP (Aichi347/4), or anti-M1  
190 (WS27-52) antibody diluted in Blocking One solution. After three washes with PBS  
191 containing 0.05% Tween-20 (v/v) (PBST), the cells were incubated for 2 h with Alexa  
192 Fluor 488 goat anti-mouse IgG (Molecular Probes) diluted in 10% Blocking  
193 One/PBST. Fluorescence signals were observed under a confocal laser microscope  
194 (LSM510META; Carl Zeiss, Jena, Germany).

195

196 **Western blotting.** Proteins on SDS-PAGE gels were transferred to a PVDF  
197 membrane for 1 h at 15 V, and the membrane was then incubated with a saturating  
198 volume of Blocking One solution (Nacalai Tesque) for 30 min at room temperature or  
199 for 18 h at 4 °C. Then, the membrane was incubated for at least 1 h at room  
200 temperature with anti-WSN (R309) or anti- $\beta$ -actin (AC-74) antibody diluted in  
201 solution I of Can Get Signal (TOYOBO). The membrane was then washed three times  
202 with TBS supplemented with 0.05% (v/v) Tween-20 (TBST), and incubated with  
203 ECL anti-mouse IgG, horseradish peroxidase-linked whole antibody (from sheep; GE  
204 Healthcare) or ECL anti-rabbit IgG, horseradish peroxidase-linked whole antibody

205 (from donkey; GE Healthcare) diluted in solution II of Can Get Signal (TOYOBO).  
206 After being washed three times with TBST, the membrane was incubated with ECL  
207 Prime Western blotting detection reagent (GE Healthcare), and chemiluminescence  
208 signals were visualized by means of a VersaDoc Imaging System (Bio-Rad).

209

210

210

211 **Supplemental References**

212 Schaefer, M.H., Fontaine, J.F., Vinayagam, A., Porras, P., Wanker, E.E., and  
213 Andrade-Navarro, M.A. (2012). HIPPIE: Integrating protein interaction networks  
214 with experiment based quality scores. *PLoS One* 7, e31826.

215 Tu, Z., Argmann, C., Wong, K.K., Mitnaul, L.J., Edwards, S., Sach, I.C., Zhu, J., and  
216 Schadt, E.E. (2009). Integrating siRNA and protein–protein interaction data to  
217 identify an expanded insulin signaling network. *Genome Research* 19, 1057-1067.

218

219
